# Supplementary material for: Mechano-, thermo-, solvato-, and vapochromism in bis(acetato-κ1O)[4′-(4-(diphenylamino)phenyl)](2,2′:6′,2′′-terpyridine-κ3N,N′,N′′)zinc(ii) and its polymer
Source: Royal Society of Chemistry journal article supplement (doi:10.1039/c7cc05022d), 2017-01-01
Supplement: c7cc05022d1.pdf [file c7cc05022d1.pdf]

Electronic Supplementary Information

**Mechano-, thermo-, solvato-, and vapochromism in bis(acetato- $\kappa^1\text{O}$ )[4'-(4-(diphenylamino)phenyl)-](2,2':6',2''-terpyridine- $\kappa^3\text{N},\text{N}',\text{N}''$ )zinc(II) and its polymer**

Takamasa Tsukamoto,<sup>a</sup> Risa Aoki,<sup>a</sup> Ryota Sakamoto,<sup>\*ab</sup> Ryojun Toyoda,<sup>a</sup> Masaki Shimada,<sup>a</sup> Yohei

Hattori,<sup>a</sup> Yasutaka Kitagawa,<sup>c</sup> Eiji Nishibori,<sup>d</sup> Masayoshi Nakano<sup>c</sup> and Hiroshi Nishihara<sup>\*a</sup>

<sup>a</sup>Department of Chemistry, Graduate School of Science, The University of Tokyo, 7-3-1, Hongo, Bunkyo-ku, Tokyo 113-0033, Japan

<sup>b</sup>JST-PRESTO, 4-1-8, Honcho, Kawaguchi, Saitama 332-0012, Japan

<sup>c</sup>Division of Chemical Engineering, Department of Materials Engineering Science, Graduate School of Engineering Science, Osaka University, 1-3, Machikaneyama, Toyonaka, Osaka 560-8531, Japan

<sup>d</sup>Division of Physics, Faculty of Pure and Applied Science, Tsukuba Research Center for Interdisciplinary Materials Science (TIMS), and Center for Integrated Research in Fundamental Science and Engineering (CIRfSE), University of Tsukuba, 1-1-1, Tennodai, Tsukuba, Ibaraki 305-8571, Japan

## Methods

**Materials.** Ligand **L1**<sup>[S1]</sup> and complex **C1**<sup>[S2]</sup> were synthesized according to previous reports. Single crystals of **C1·MeOH**, and powdery polycrystals of **C1** were prepared according to the previous report.<sup>[S2]</sup> Diethyl ether, methanol, benzyl alcohol, triethylamine and zinc carbonate were purchased from Kanto Chemical Co., Inc. *i*-Butanol and *s*-butanol were supplied by Nacalai Tesque, Inc. *n*-Butanol, *t*-butanol, *n*-propanol, ethanol and PAA (mean molecular weight = 1,000,000) were purchased from Wako Pure Chemical Industries, Ltd. Dichloromethane were supplied by Asahi Glass Co., Ltd. All solvents were used as received.

**Preparation of C1-PAA.** 1.6 mg of **L1** (3.4  $\mu\text{mol}$ ) and 38 mg of PAA (0.53 unit mmol) were added to MeOH (10 mL), and the reaction mixture was sonicated for 10 min. Then 13 mg of  $\text{ZnCO}_3$  (0.10 mmol) in MeOH (10mL) was added and sonicated for 10 min. The reaction mixture was evaporated under a reduced pressure, and a mixture of MeOH and  $\text{CH}_2\text{Cl}_2$  (1:49 v/v) was added to produce orange yellow gummy solid of **C1-PAA**. After removal of the solvent under a reduced pressure, orange yellow solid of **C1-PAA** as a xerogel was obtained (38.7 mg).

**Instruments.** UV/vis absorption spectra were obtained on a JASCO V-570 spectrometer. Steady-state PL and excitation spectra were recorded on a HITACHI F-4500 or a JASCO FP-8600 spectrometer. Absolute fluorescence quantum yields were measured on Hamamatsu Photonics C9920-02G. Fluorescence lifetime measurements were conducted using Hamamatsu Photonics Quantaurus-Tau C11367-02. IR spectra as KBr pellets were recorded using a Thermo Scientific FT-IR iS50 spectrometer. A solid sample was placed into a mortar and ground together with KBr crystals. The resultant fine powder was pelletized by applying a pressure, which was subjected to FT-IR measurement.

**Solid sample preparations for optical properties.** For PL spectroscopy, complexes in the crystalline solid state were held gently between quartz substrates. For mechanochromism, single crystal of **C1·MeOH** was ground using a spatula on a glass substrate. For vapoluminochromism, crystal-solvent-free **C1** in a 6 mL vial was placed in a 50 mL vial poured with 5 mL solvent, then the bigger vial was closed. All measurements were carried out at room temperature under air otherwise stated.

**DFT calculation methods.** The gas phase structure of complex **C1** was optimized at the B3LYP/6-31+G\* level of theory using the crystal structure of crystal-solvent-free **C1** as the initial geometry (Fig. S2). For the estimation of the ICT transition energy in the crystal phase, the molecular structures of **C1** and **C1·MeOH** were taken from the data of X-ray crystallographic analyses. The excitation energies of 10 low-lying excited states (S1–S10) were calculated using the TD-B3LYP/6-31+G\* method in the gas phase. All calculations were performed by Gaussian 09 revision C.01.<sup>[S7]</sup> The calculated frontier molecular orbitals were plotted using a GaussView 5.0 program package with an isovalue of 0.02 atomic unit. Therein, the positive and negative wavefunctions were in brown and green, respectively.

**Solvatochromism of C1-PAA gel.** The gel was immersed into a plenty volume of organic solvent till reaching saturation of solvent uptake. The gel could mix with water at any mixing ratio, such that 0.2 mL of water was added to 1.5 mg of **C1-PAA**.

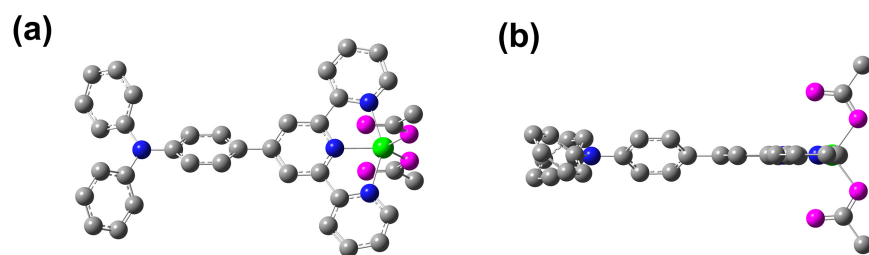

**Fig. S1.** DFT optimized structure of **C1** in the gas phase. (a) Oblique view; (b) Side view. The dihedral angle determined by the central pyridine and neighboring phenylene is 37.28°.

(a) C1

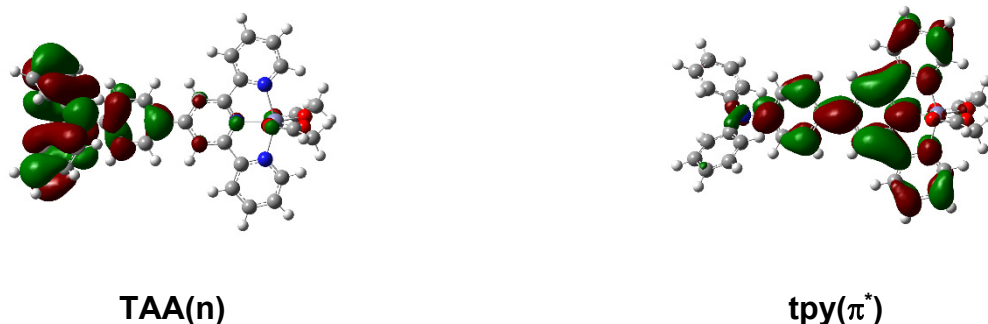

(b) C1·MeOH

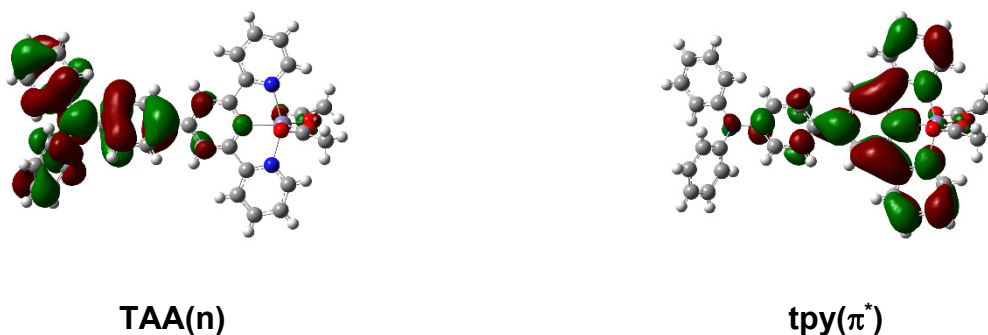

**Fig. S2.** Contour plots for frontier orbitals involved in the ICT transition provided by DFT/B3LYP/6-31+G\*. (a) Isolate molecules from crystal lattices **C1**. (b) From crystal lattice **C1·MeOH**.

**Table S1.** Parameters of the ICT transition provided by TDDFT/B3LYP/6-31+G\*.

| Complex        | Transition energy / eV | Transition energy /nm | Oscillator strength | Occupancy / % |
|----------------|------------------------|-----------------------|---------------------|---------------|
| <b>C1</b>      | 2.6266                 | 472.03                | 0.3226              | 93            |
| <b>C1·MeOH</b> | 2.8650                 | 432.74                | 0.3829              | 98            |

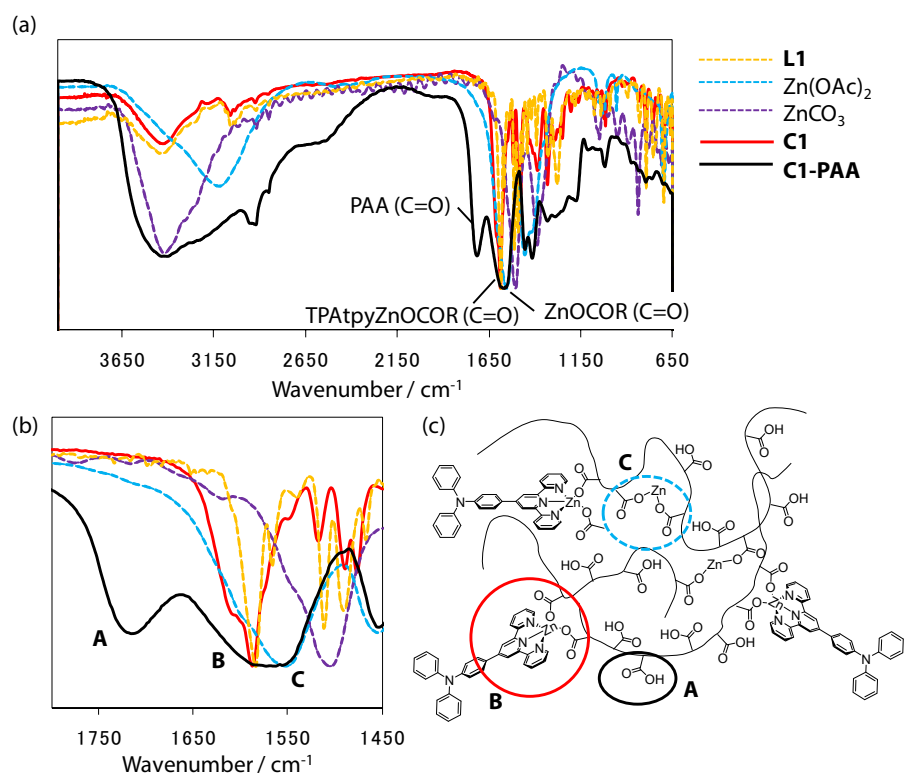

**Fig. S3.** (a,b) IR spectra of **C1-PAA**, **C1**, **L1**,  $\text{Zn}(\text{OAc})_2$ , and  $\text{ZnCO}_3$ . (a) whole region; (b) focusing on the C=O stretch region. (c) Plausible schematic illustration of the chemical structure of **C1-PAA**. A, B, C denote the residues that show the peaks labeled in (b).

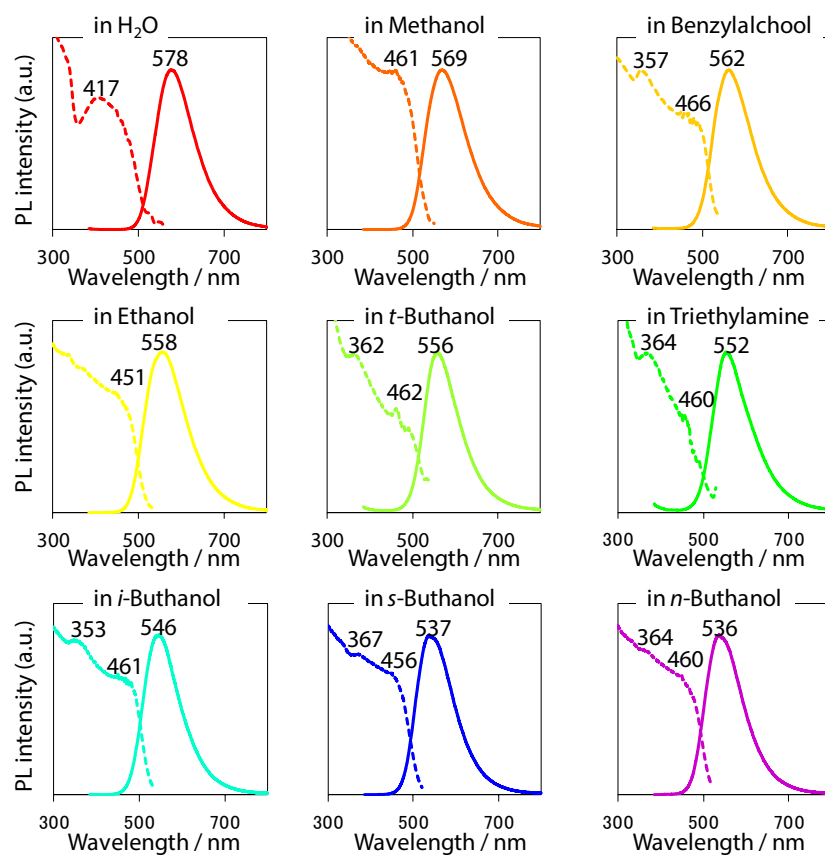

**Fig. S4.** Excitation and PL spectra of organo- and hydrogels of **C1-PAA**.

**Table S2.** Photophysical properties of organo- and hydrogels of **C1-PAA**

|                  | Excitation photon energy |                  | PL photon energy |                  |
|------------------|--------------------------|------------------|------------------|------------------|
|                  | nm                       | cm <sup>-1</sup> | nm               | cm <sup>-1</sup> |
| <i>n</i> -BuOH   | 460                      | 21700            | 536              | 18700            |
| <i>s</i> -BuOH   | 456                      | 21900            | 537              | 18600            |
| <i>i</i> -BuOH   | 461                      | 21700            | 546              | 18300            |
| NEt <sub>3</sub> | 460                      | 21700            | 552              | 18100            |
| <i>t</i> -BuOH   | 462                      | 21600            | 556              | 18000            |
| EtOH             | 451                      | 22200            | 558              | 17900            |
| BzOH             | 466                      | 21500            | 562              | 17800            |
| MeOH             | 461                      | 21700            | 569              | 17600            |
| H <sub>2</sub> O | 417                      | 24000            | 578              | 17300            |

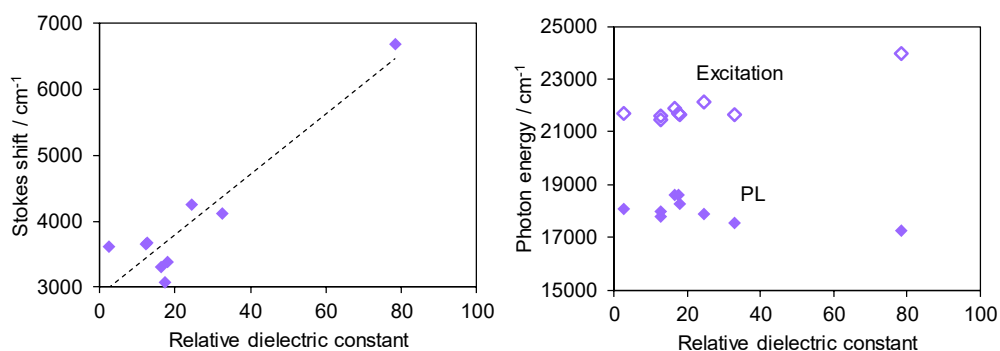

**Figure S5.** (a) Plots between the Stokes shift of organo- and hydrogels of **C1-PAA** and relative dielectric constant. (b) Plots between the excitation or PL maximum of organo- and hydrogels of **C1-PAA** and relative dielectric constant.



## References for Electronic Supplementary Information

- [S1] X. Chen, Q. Zhou, Y. Cheng, Y. Geng, D. Ma, Z. Xie and L. Wang, *J. Lumi.*, 2007, **126**, 81–90.
- [S2] T. Tsukamoto, R. Aoki, R. Sakamoto, R. Toyoda, M. Shimada, Y. Hattori, M. Asaoka, Y. Kitagawa, E. Nishibori, M. Nakano and H. Nishihara, *Chem. Commun.*, 2017, **53**, 3657–3660.
- [S3] E. Nishibori, M. Takata, K. Kato, M. Sakata, Y. Kubota, S. Aoyagi, Y. Kuroiwa, M. Yamakata and N. Ikeda, *Nucl. Instrum. Methods Phys. Res. A*, 2001, **467**, 1045–1048.
- [S4] A. Boultif and D. Louër, *J. Appl. Cryst.*, 2004, **37**, 724–731.
- [S5] E. Nishibori, T. Ogura, S. Aoyagi and M. Sakata, *J. Appl. Cryst.*, 2008, **41**, 292–301.
- [S6] E. Nishibori, E. Sunaoshi, A. Yoshida, S. Aoyagi, K. Kato, M. Takata and M. Sakata, *Acta Cryst.*, 2007, **A63**, 43–52.
- [S7] Gaussian 09 revision C.01, M. J. Frisch et al. Gaussian, Inc., Wallingford CT, 2009.
